# Supplementary material
Source: publisher figshare collection journal article supplement (https://gsajournals.figshare.com/ndownloader/files/13025513)
Supplement: Supplementary file 1 [file 13025513]

## Sheet: FLAGWAGO crRNAs Donors Primers
Gene name	Gene ID	Guide name	Guide sequence	Donor name	Donor Sequence	Fwd primer name	Fwd genotyping primer sequence	Rev primer name	Rev genotyping primer sequence	notes
wago-1	R06C7.1	cmg6	GGATGCGGTTGTGGTGGATG	cmd17	cttttttcagaactaatattgcaatagtaataagatgGATTACAAAGACCATGATGGTGACTATAAGGATCATGATATTGACTATAAAGACGATGACGATAAGtctccAcaCccGccTcaGccgcatccaccgatgcctccaatgccaccagtcac	cmo17646	ctccaatctcgcttattcgg	cmo17647	caacctgcaaatatggcattag	wago-1 and wago-2 are highly similar near the ATG and no specific guide could be designed; thus one guide targeting both loci was used.
wago-2	F55A12.1	cmg6	GGATGCGGTTGTGGTGGATG	cmd6	tttttcagatctaatattgcaatagtaataagatgGATTACAAAGACCATGATGGTGACTATAAGGATCATGATATTGACTATAAAGACGATGACGATAAGtctccGcaCccTccTcaGccgcatccaccgatgcctccaatgccaccagtcac	cmo17628	gacgcttcgcatctgttatc	cmo17629	tcgttgccagtgatttgatg	wago-1 and wago-2 are highly similar near the ATG and no specific guide could be designed; thus one guide targeting both loci was used.
wago-3/ppw-2	Y110A7A.18	cmg7	attcacaATGCCTGCTACAC	cmd7	atttcaggtagtattcactaacaacattcacaatgGATTACAAAGACCATGATGGTGACTATAAGGATCATGATATTGACTATAAAGACGATGACGATAAGcctgctacaccTgttccaccggtaacaatgccaccagtgccaccagt	cmo17630	agagaatgcatgtatcccgaaa	cmo17631	gtgacaggaagagtcggaac
wago-4	F58G1.1	cmg8	GTGTAGACTGGAGGAAGAGC	cmd8	atttacaggtaatagttacaaaatcgagaaggatgGATTACAAAGACCATGATGGTGACTATAAGGATCATGATATTGACTATAAAGACGATGACGATAAGccTgcActGccGccTgtctacacgccttctggagctccatcgagcgtcca	cmo17632	cacctacagtaacccagaattt	cmo17633	ggaactggaactggtggaac
wago-5	ZK1248.7	cmg9	GAATACTGGCGTTGTCCTGT	cmd9	ctgctgagaaaggcacgagttgaattggctgaatgGATTACAAAGACCATGATGGTGACTATAAGGATCATGATATTGACTATAAAGACGATGACGATAAGaatactggcgttgtcctgttAgatcaaaatgatcaaaagctctaccaaacgactgcc	cmo17634	atggcgttccatgaattctc	cmo17635	ttctttcagacgattgatgc
wago-6/sago-2	F56A6.1	cmg21	TTCCAGAGTCTCTCGAACTA	cmd19	caatttttattcattccagagtctctcgaactatgCCCGATTACAAAGACCATGATGGTGACTATAAGGATCATGATATTGACTATAAAGACGATGACGATAAGgaaaaacaactaaaagctatgtccgtctcAgacaaacctgctgccccagctgcccaaaagcttggt	cmo17636	acatgagtcacaccttatcac	cmo17637	cactcctcatttctcgtcttt	added CCC in the donor after ATG to disrupt PAM
wago-7/ppw-1	C18E3.7	cmg1	AGCTTCTAGTTGTTTTTCCA	cmd1	caattttcattcattccagagtctctcgaaccATGGATTACAAAGACCATGATGGTGACTATAAGGATCATGATATTGACTATAAAGACGATGACGATAAGGAAAAACAACTAGAAGCTATGTTCGTCTCGGACAG	cmo17618	agcaagccgcgagtattaaa	cmo17619	ccctctccacatttctcgtc	tags 2nd ATG (not all isoforms)
wago-8	K12B6.1	cmg2	GACTTGGGTGATATTGGACA	cmd2	tttcgagctactcctcacacacaacactcgccATGGATTACAAAGACCATGATGGTGACTATAAGGATCATGATATTGACTATAAAGACGATGACGATAAGTCCAATATCACCCAAGTCACCAGCAGCATGGCTTC	cmo17620	accctgtggatcaaaacgtg	cmo17621	tgttggagagtgaggctgaa
wago-9/hrde-1	C16C10.3	cmg18	CATAATTTTGTCGAGCAAGT	cmd18	tcgtttcatcgtttcttatttcagtcaaacatgGATTACAAAGACCATGATGGTGACTATAAGGATCATGATATTGACTATAAAGACGATGACGATAAGgcAgacttgctcgacaaaattatgggaagttcgtcttccaac	cmo17648	aatctcaatcaggacggtaaag	cmo17649	gaactcctaggcataatgttga
wago-10	T22H9.3	cmg3	GACGGATTTTGGACGGTAGT	cmd3	aaatttattgctcctgaaactgtgttcaagttATGGATTACAAAGACCATGATGGTGACTATAAGGATCATGATATTGACTATAAAGACGATGACGATAAGCCGACaACaGTaCAgAATCCGTCCCCAACTGGATTTCTTCCGCA	cmo17622	gacgtggaacaaatcaccaa	cmo17623	attaccgggtcttttcgttg
wago-11	Y49F6A.1	cmg4	GTTCTCTTCGGGATGCGGTA	cmd4	ttagattgaataagtgactatttttcaaaaatATGGATTACAAAGACCATGATGGTGACTATAAGGATCATGATATTGACTATAAAGACGATGACGATAAGTCAAATCAAGAGCCATAtCGgATtCCcAAGAGAACCGCTTCTGgttagttttt	cmo17624	atgtggaatcgaaagcgaac	cmo17625	ttgaatcgcttgtgtgaaatg
wago-12/nrde-3	R04A9.2	cmg5	AGACAAAGTAATGGGTGAGA	cmd5	aaatttctttcaggtaatttgcacaactaatcATGGATTACAAAGACCATGATGGTGACTATAAGGATCATGATATTGACTATAAAGACGATGACGATAAGGATCTtCTAGACAAAGTAATGGGTGAGATGGGCTCTAAGCCAGGCT	cmo17626	tgtgctgacgctgtttttct	cmo17627	cagttgagcctggcttagag

## Sheet: Oligos for PCR donors
Oligo name	sequence
cmo17667F_wago4_GFPdonor	gatgctcgttttgtgtttttgtgttgtatttttgttgcttttttcgcatttttctatacgttaagtcttatttcgtcttgaattttaaatttacaggtaatagttacaaaatcgagaaggatgAGTAAAGGAGAAGAACT
cmo17668R_wago4_GFPdonor	GTTAGACGTTTGATACTCCGATCTTAACGGTTGAGTCGGAACTGGAACTGGTGGAACGGCAGGTGGTGCGTGGACGCTCGATGGAGCTCCAGAAGGCGTGTAGACAGGCGGCAGTGCAGGTTTGTATAGTTCATCCATGC
cmo17669F_wago7_GFPdonor	taattttagagtgagcaagccgcgagtattaaaccagcgctgttttaaactgataatgattgcactttccttcattctcaccgaatatcaattttcattcattccagagtctctcgaaccatgAGTAAAGGAGAAGAACT
cmo17670R_wago7_GFPdonor	GACCTTGGTTCCCCTCTCCACATTTCTCGTCTTTTTTGCAGCGAGCGGAGCGGTACCAAGCTTTTGGGCAGCTGGGGCAGCAGGTCTGTCCGAGACGAACATAGCTTCTAGTTGTTTTTCTTTGTATAGTTCATCCATGC
cmo17671F_wago6_GFPdonor	taatttcagagtgagcaagccgcgagtattaaaccagcgctgttttaaactgataatgattgcagtttccttcattctcaccgaatatcaatttttattcattccagagtctctcgaactatgAGTAAAGGAGAAGAACT
cmo17672R_wago6_GFPdonor	GACCTTGGTTCCCCACTCCTCATTTCTCGTCTTTTTTGCAGCGAGCGGAGCGGTACCAAGCTTTTGGGCAGCTGGGGCAGCAGGTTTGTCCGAGACGGACATAGCTTTTAGTTGTTTTTCTTTGTATAGTTCATCCATGC
GFP_gcna1_donor_35bpF	tctcgtattctgcaaatcttctgtattcctcaATGagtaaaggagaagaactttt
GFP_gcna1_donor_35bpR	TACTTTTGTTATGAAGATCTCGAAATGGTGTAGGtttgtatagttcatccatgc
GFP_gcna1_donor_120bpF	cgtcatttctggcaacaaatacgcaattgcaccaacggcgcttaatttgccgccaatcaaaaatttcaaagattaaaattatttttctcgtattctgcaaatcttctgtattcctcaATGagtaaaggagaagaactttt
GFP_gcna1_donor_120bpR	GGAACTCCATGCTGTTctgcaaaaaatgttcctacaatcttaaaatccttccaaaaaacttacTCGTACGATGACGCTGAAGCATTACTTTTGTTATGAAGATCTCGAAATGGTGTAGGtttgtatagttcatccatgc
mCherry_dvc1_donor_35bpF	catcgttcacataatttccgcagccacaaagaATGgtctcaaagggtgaagaaga
mCherry_dvc1_donor_35bpR	AGTTCAAAAGACGGGTCTACGAGAGAGCTGCGACTcttatacaattcatccatgc
mCherry_dvc1_donor_120bpF	ttaattgaagttattatcataattaaagtattcctcctctctaatggataaaagtttacagtattctactcgatttccacatctccatcgttcacataatttccgcagccacaaagaATGgtctcaaagggtgaagaaga
mCherry_dvc1_donor_120bpR	atttattttcgctacctcaatattatgaatctacCTTGCATCAAACTGGATGAACAACGCGTGAATATCCGGGCACGGATCCGAAAGTTCAAAAGACGGGTCTACGAGAGAGCTGCGACTCttatacaattcatccatgc
top2_mCherry_donor_35F	AGAAGAGGGGACGCGTCGTCGACTCCGACTCGGATgtctcaaagggtgaagaaga
top2_mCherry_donor_35R	aaacacttaaggaaggtgggaaacaaattaatTTActtatacaattcatccatgc
top2_mCherry_donor_120F	aaatgtaattatttcagCGGAAGAGCTCGCAAGGCGCCACCAACTTACGACGTGGATTCAGGATCCGATTCGGATCAGCCAAAGAAGAAGAGGGGACGCGTCGTCGACTCCGACTCGGATgtctcaaagggtgaagaaga
top2_mCherry_donor_120R	taatatacgggatgatttgggggaggatggggatggttgagatcgttaaaacgattttaaaatgattggaaagaaaataaattagaaacacttaaggaaggtgggaaacaaattaatTTActtatacaattcatccatgc
mCherry_insert_PCR _F	taacatggcaattattaaag
mCherry_insert_PCR_R	cacctgtcgagtgccgccct
GFP_insert_PCR_F	agtaaaggagaagaactttt
GFP_insert_PCR_R	gcatggatgaactatacaaa
cmo_KG467F_GFP_for_junction_sequencing	gttcggtactaactaaccatac
cmo_KG468R_GFP_for_junction_sequencing	CTATTAACAAGGGTATCACC
cmo_14672_mCherry_for_junction_sequencing	tcttaaattgaaagatggag
cmo_14673_mCherry_for_junction_suquencing	ATATCTGCCGGATGTTTAAC

## Sheet: PCR tag genotying oligos
gcna-1_F	atcgctcgagacgttcagtt
gcna-1_R	cttcgaaggttttccacacg
top-2_F	tggctccaagagagaagagg
top2_R	cagcagtttccctcatgtaaaa
dvc-1_F	gcatctgagcggtttcagag
dvc-1_R	aaaaatggcgtctccgagt
cmo17632F_wago4	cacctacagtaacccagaattt
cmo_17640R_wago4_gfp	tccagtctcttgatgcaagc

## Sheet: additional crRNAs used
GFP_crRNA	tgctgggattacacatggca
gcna-1_crRNA	tcgaaatggtgtaggcattg
dvc-1_crRNA	gagctgcgactcattctttg
top-2_crRNA	caaattaatttaatccgagt
